# Supplementary material for: Porous silicon decorated with Au/TiO2 nanocomposites for efficient photoinduced enhanced Raman spectroscopy
Source: Royal Society of Chemistry journal article supplement (doi:10.1039/d3ra02598e), 2023-01-01
Supplement: d3ra02598e1.pdf [file d3ra02598e1.pdf]

## Supporting information

### Porous Silicon Decorated With Au/TiO<sub>2</sub> Nanocomposites for Efficient Photoinduced Enhanced Raman Spectroscopy

Sheng-Yang Huang<sup>a</sup>, Wei-Ning Gao<sup>b</sup>, Chia-Man Chou<sup>a,c,d,\*</sup>, and Vincent K. S. Hsiao<sup>b,\*</sup>

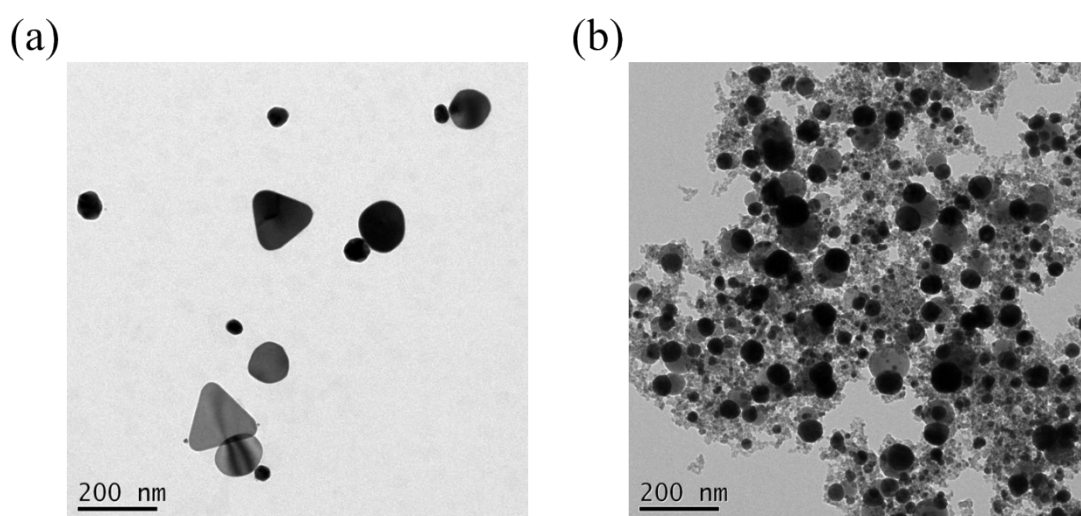

Fig. S1 Transmission electron micrograph (TEM) of (a) bare Au NPs and Au-TiO<sub>2</sub> NCPs fabricated using PLIP method.

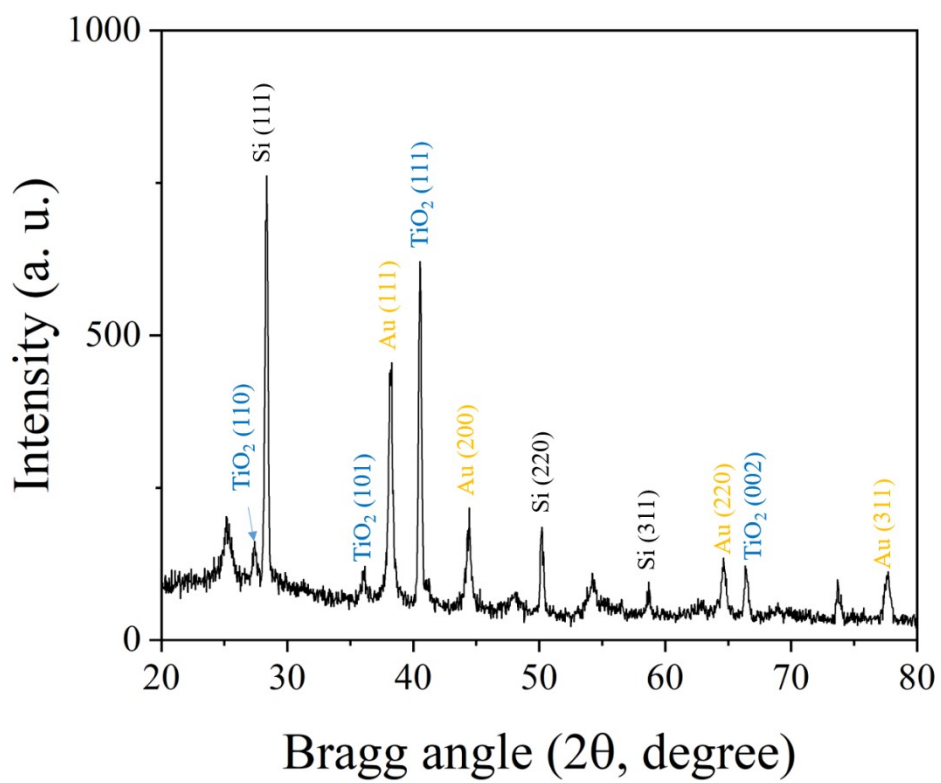

Fig. S2 X-ray diffraction (XRD) pattern of Au-TiO<sub>2</sub> NCPs on PSi fabricated using PLIP method.
